# Supplementary material
Source: publisher figshare collection journal article supplement (https://frontiersin.figshare.com/ndownloader/files/28407417)
Supplement: Supplementary file [file 28407417]

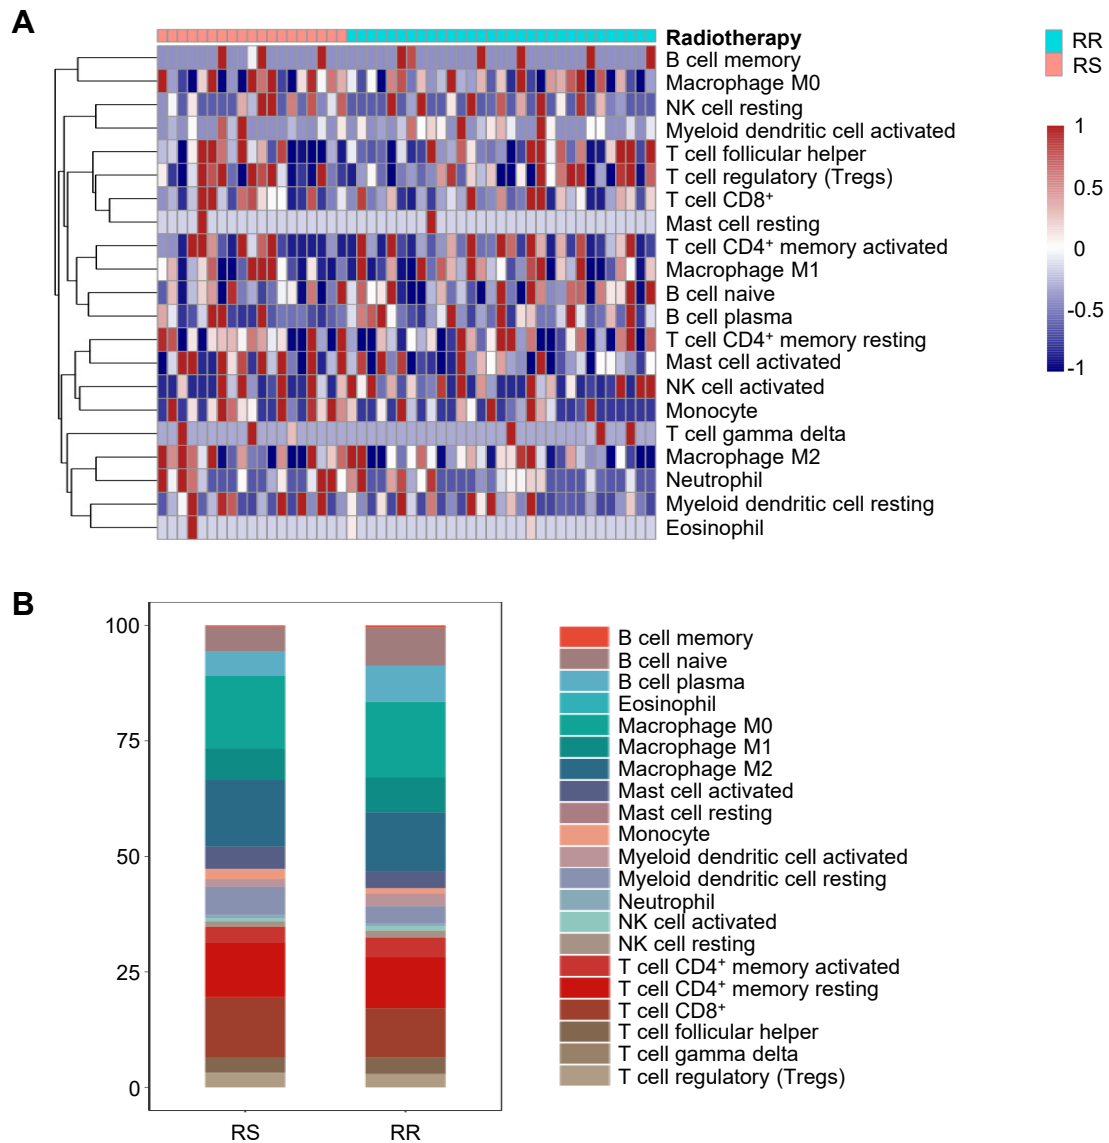

**Supplementary Figure 1. Tumor-infiltrating immune cells of RR and RS samples from LUAD patients using CIBERSORT-ABS in TIMER2.0. (A)** The heatmap shows the CIBERSORT-ABS scores of tumor-infiltrating immune cells in RR and RS groups. **(B)** The barplot shows the proportion of tumor-infiltrating immune cells in the RR and RS groups.
